# Supplementary material
Source: HighWire-hosted journal article supplement (https://erj.ersjournals.com/content/55/4/1902476)
Supplement: inline-supplementary-material-1 [file inline-supplementary-material-1.pdf]

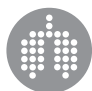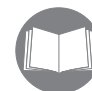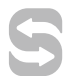

SHAREABLE PDF

# NORDSTAR: paving the way for a new era in asthma research

Kirk Geale <sup>1,2</sup>, Hatef Darabi<sup>1</sup>, Maria Lindh<sup>1</sup>, Hanna Fues Wahl<sup>1</sup>, Oskar Ström<sup>1,3</sup>, Hui Cao<sup>4</sup>, Luisa Alvares<sup>5</sup>, Rikke Dodge<sup>6</sup>, Emil Loeffroth<sup>7</sup>, Alan Altraja<sup>8</sup>, Vibeke Backer<sup>9</sup>, Helena Backman<sup>10</sup>, Leif Bjermer<sup>11</sup>, Apostolos Bossios<sup>12,13</sup>, Bernt Bøgvald Aarli<sup>14</sup>, Barbro Dahlén<sup>15</sup>, Ole Hilberg<sup>16</sup>, Christer Janson<sup>17</sup>, Hannu Kankaanranta<sup>18</sup>, Jussi Karjalainen<sup>19</sup>, Paula Kauppi<sup>20</sup>, Maritta Kilpeläinen<sup>21,22</sup>, Sverre Lehmann<sup>23</sup>, Lauri Lehtimäki<sup>19,24</sup>, Bo Lundbäck<sup>25</sup>, Thomas Sandström<sup>10</sup>, Charlotte Suppli Ulrik<sup>26</sup>, Asger Sverrild<sup>27</sup>, Arja Viinanen<sup>18,21,22</sup>, Anna von Bülow<sup>28</sup>, Valentyna Yasinska<sup>29</sup> and Celeste Porsbjerg<sup>30</sup>

**Affiliations:** <sup>1</sup>Quantify Research, Stockholm, Sweden. <sup>2</sup>Dept of Public Health and Clinical Medicine, Umeå University, Umeå, Sweden. <sup>3</sup>Dept of Learning, Informatics, Management and Ethics (LIME), Medical Management, Stockholm, Sweden. <sup>4</sup>Novartis Pharmaceuticals Corporation, East Hanover, NJ, USA. <sup>5</sup>Novartis Pharma AG, Basel, Switzerland. <sup>6</sup>Novartis Pharmaceuticals A/S, Copenhagen, Denmark. <sup>7</sup>Novartis Sverige AB, Kista, Sweden. <sup>8</sup>Dept of Pulmonary Medicine, University of Tartu, and Dept of Pulmonary Medicine, Tartu University Hospital Tartu, Estonia. <sup>9</sup>Centre for Physical Activity Research, Rigshospitalet and Copenhagen University, Copenhagen, Denmark. <sup>10</sup>Dept of Public Health and Clinical Medicine, University Hospital of Umeå, Umeå University, Umeå, Sweden. <sup>11</sup>Respiratory Medicine and Allergology, Dept of Clinical Sciences, Lund, Sweden. <sup>12</sup>Dept of Respiratory Medicine and Allergy, Karolinska University Hospital Huddinge, Stockholm, Sweden. <sup>13</sup>Dept of Medicine, Huddinge, Karolinska Institutet, Stockholm, Sweden. <sup>14</sup>Dept of Clinical Science, University of Bergen, Haukeland University hospital, Bergen, Norway. <sup>15</sup>Dept of Medicine, Karolinska University Hospital Huddinge and Karolinska Institutet, Stockholm, Sweden. <sup>16</sup>IRS-center, Lillebælt Hospital, Medicine, Vejle, Denmark. <sup>17</sup>Dept of Medical Sciences, Respiratory, Allergy and Sleep Research, Uppsala University, Uppsala, Sweden. <sup>18</sup>Seinäjoki Central Hospital, Seinäjoki, Finland. <sup>19</sup>Allergy Centre, Tampere University Hospital, Tampere, Finland. <sup>20</sup>Dept of Allergy, Respiratory Diseases and Allergology, University of Helsinki and Helsinki University Hospital, Helsinki, Finland. <sup>21</sup>Division of Medicine, Dept of Pulmonary Diseases, Turku University Hospital, Turku, Finland. <sup>22</sup>Dept of Pulmonary Diseases and Clinical Allergology, University of Turku, Turku, Finland. <sup>23</sup>Haukeland University Hospital, Bergen, Norway. <sup>24</sup>Faculty of Medicine and Health Technology, Tampere University, Tampere, Finland. <sup>25</sup>Dept of Internal Medicine at Institute of Medicine/Krefting Research Centre, University of Gothenburg and Sahlgrenska University Hospital, Gothenburg, Sweden. <sup>26</sup>Dept of Respiratory Medicine, Hvidovre University Hospital and Institute of Clinical Medicine, University of Copenhagen, Copenhagen, Denmark. <sup>27</sup>Dept of Respiratory Medicine, Bispebjerg Hospital, Copenhagen University, Copenhagen, Denmark. <sup>28</sup>Dept of Respiratory Medicine, Bispebjerg and Frederiksberg Hospital, Copenhagen, Denmark. <sup>29</sup>Dept of Respiratory Medicine and Allergy, Karolinska University Hospital, Stockholm, Sweden. <sup>30</sup>Dept of Respiratory Medicine, Respiratory Research Unit, Bispebjerg Hospital, Copenhagen, Denmark.

**Correspondence:** Kirk Geale, Umeå Universitet Medicinska fakulteten, Public Health and Clinical Medicine, Umeå University, Umeå, 901 87, Sweden. E-mail: kirk.geale@umu.se

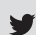

@ERSpublications

**NORDSTAR is a longitudinal dataset for the study of asthma comprising 3.3 million individuals and over 50 million person-years in 4 Nordic countries. The data include diagnoses, medication dispensing, use of resources and costs, socio-demographics, and mortality.** <http://bit.ly/2HueyEt>

**Cite this article as:** Geale K, Darabi H, Lindh M, *et al.* NORDSTAR: paving the way for a new era in asthma research. *Eur Respir J* 2020; 55: 1902476 [https://doi.org/10.1183/13993003.02476-2019].

This single-page version can be shared freely online.

Asthma is a heterogeneous, chronic airway disease with large variation in prevalence between geographies [1, 2]. In the Nordic countries, prevalence of asthma has been reported to be 10% in Denmark [1], 9–11% in Finland [1, 3], 11–12% in Norway [1], and 8–10% in Sweden [1, 4, 5]. Poor asthma control is associated with substantial reductions in patient quality of life [6–8], and higher morbidity and mortality [9, 10], together with significantly increased direct and indirect costs [6, 11].
